# Supplementary material
Source: publisher figshare collection journal article supplement (https://acs.figshare.com/ndownloader/files/28061751)

## Supporting Information

### Phenoxazine-containing polyaniline derivatives with improved electrochemical stability and processability

Mohammed Almtiri, Timothy J. Dowell, Iwei Chu, David O. Wipf, and Colleen N. Scott\*

Mississippi State University, Department of Chemistry, 310 President Circle, Mississippi State, MS 39762

Email: cscott@chemistry.msstate.edu

**Table S1:** Screened conditions for Buchwald/Hartwig reaction with the synthesis of the small molecule.

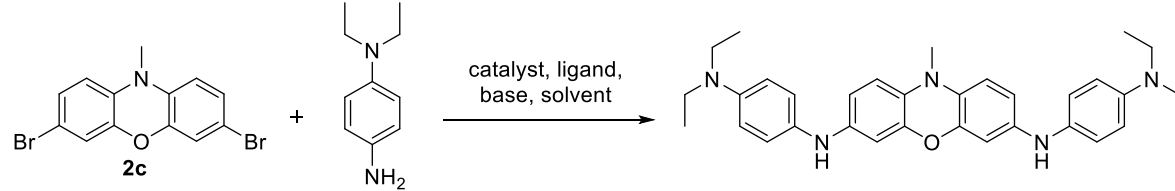

| Entry    | catalyst                         | ligand       | base                            | solvent    | temp<br>(°C) | time<br>(h) | isolated<br>yield (%) |
|----------|----------------------------------|--------------|---------------------------------|------------|--------------|-------------|-----------------------|
| 1        | Pd <sub>2</sub> dba <sub>3</sub> | BINAP        | KO <i>t</i> But                 | THF        | 85           | 24          | none                  |
| 2        | Pd(OAc) <sub>2</sub>             | Xphos        | CS <sub>2</sub> CO <sub>3</sub> | THF        | 85           | 72          | mono                  |
| 3        | Pd <sub>2</sub> dba <sub>3</sub> | Xantphos     | CS <sub>2</sub> CO <sub>3</sub> | Dioxane    | 100          | 24          | none                  |
| 4        | Pd(OAc) <sub>2</sub>             | Xphos        | CS <sub>2</sub> CO <sub>3</sub> | Toluene    | 100          | 48          | none                  |
| 5        | Pd(OAc) <sub>2</sub>             | Xphos        | CS <sub>2</sub> CO <sub>3</sub> | Dioxane    | 100          | 48          | none                  |
| 6        | Pd(OAc) <sub>2</sub>             | Xphos        | KO <sup>t</sup> But             | Toluene    | 100          | 72          | traces                |
| <b>7</b> | <b>Pd(OAc)<sub>2</sub></b>       | <b>Xphos</b> | <b>NaO <sup>t</sup>But</b>      | <b>THF</b> | <b>85</b>    | <b>18</b>   | <b>72</b>             |

1 equiv. dibromide, 2 equiv. N,N-diethyl-PPDA.

**Figure S1:**  $^1\text{H}$  NMR of crude product of small molecule and the dibrominated xanthene starting material. Peaks “a” and “b” shifted up-field in the product and no residual peaks were seen in the crude.

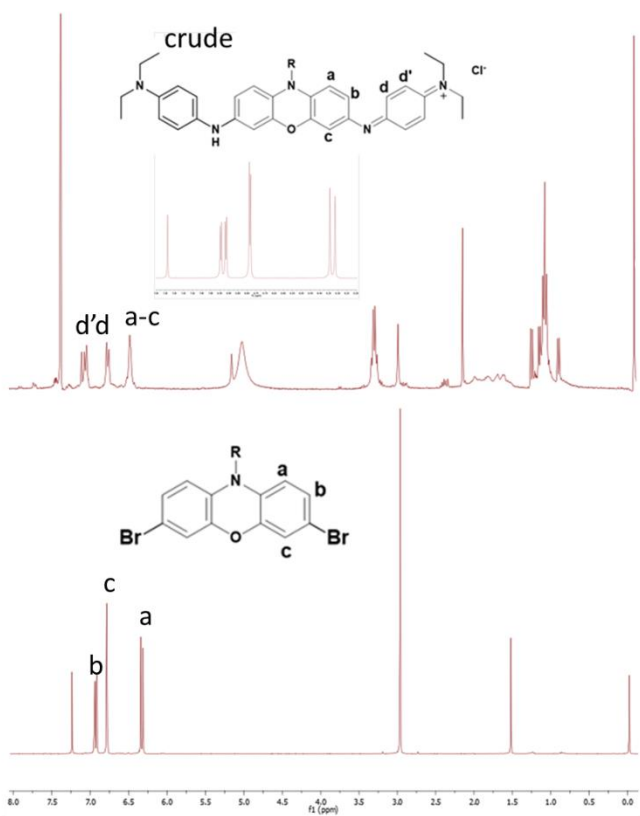

**Table S2:** Condition optimization of the polymers.

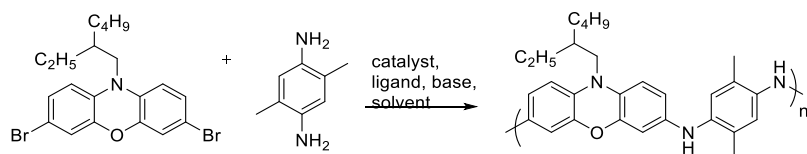

| Entry        | Pd                                          | Ligand       | Base                                      | Solvent    | $M_n$<br>(g/mol) <sup>[a]</sup> | $M_w$<br>(g/mol) <sup>[a]</sup> | $\bar{D}$ <sup>[a]</sup> |
|--------------|---------------------------------------------|--------------|-------------------------------------------|------------|---------------------------------|---------------------------------|--------------------------|
| <b>Opt-1</b> | <b><math>\text{Pd}(\text{OAc})_2</math></b> | <b>Xphos</b> | <b><math>\text{NaO}^t\text{Bu}</math></b> | <b>THF</b> | <b>12300</b>                    | <b>25350</b>                    | <b>2.06</b>              |
| Opt-2        | $\text{Pd}(\text{dba})_2$                   | BINAP        | $\text{NaO}^t\text{Bu}$                   | THF        | 9280                            | 15710                           | 1.69                     |
| Opt-3        | $\text{Pd}(\text{OAc})_2$                   | dppf         | $\text{NaO}^t\text{Bu}$                   | THF        | 3190                            | 5260                            | 1.65                     |
| Opt-4        | $\text{Pd}(\text{dba})_2$                   | dppf         | $\text{NaO}^t\text{Bu}$                   | THF        | 2230                            | 3060                            | 1.371                    |

<sup>[a]</sup>  $M_n$ ,  $M_w$ , and PDI of the polymers were determined by gel permeation chromatography using polystyrene standards in THF at 40 °C.

**Figure S2:** GPC data for polymer optimization. GPC traces of polymers eluted with THF at 40 °C at a flow rate of 0.7 mL/min.

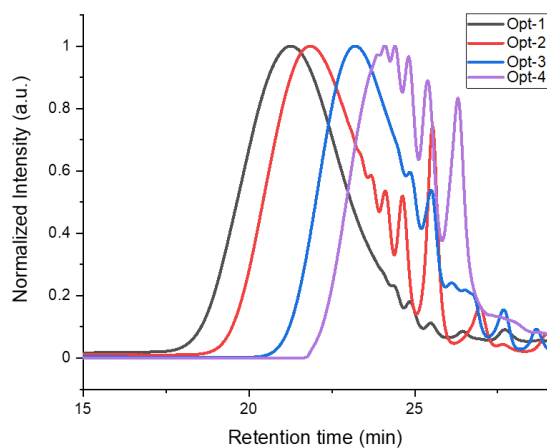

**Figure S3:**  $^1\text{H}$  NMR of small molecule

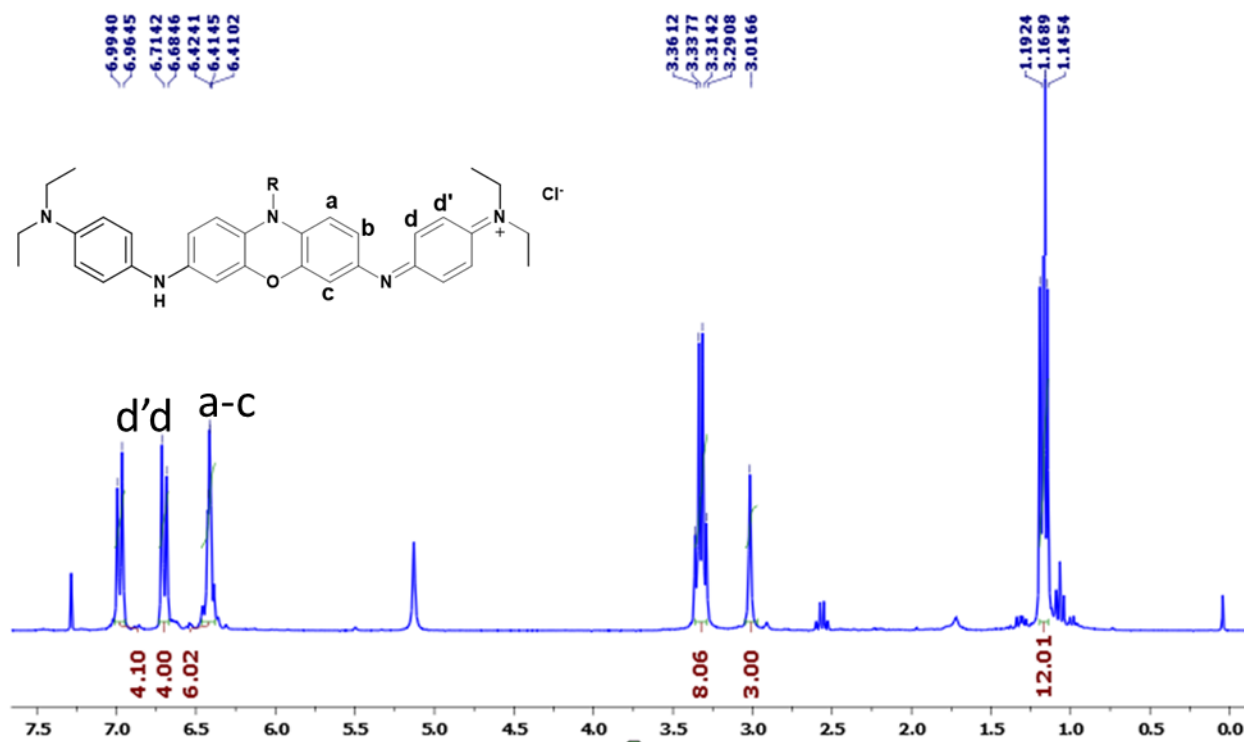

**Table S3:** Molecular weight distribution of different R-groups on **P1** and **P2**.

| P1 R-group                                                                        | Mn    | Mw    | Mw/Mn |
|-----------------------------------------------------------------------------------|-------|-------|-------|
| CH <sub>3</sub>                                                                   | 700   | 5860  | 8.23  |
| 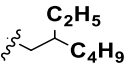 | 12360 | 20260 | 1.64  |
|  | 45180 | 60990 | 1.35  |

  

| P2 R-group                                                                        | Mn    | Mw    | Mw/Mn |
|-----------------------------------------------------------------------------------|-------|-------|-------|
| CH <sub>3</sub>                                                                   | -     | -     | -     |
|  | 12000 | 16960 | 1.41  |
|  | 18050 | 24630 | 1.37  |

**Figure S4:** Solubility chart showing the effect of the size of the alkyl group on solubility of **P1** and **P2**.

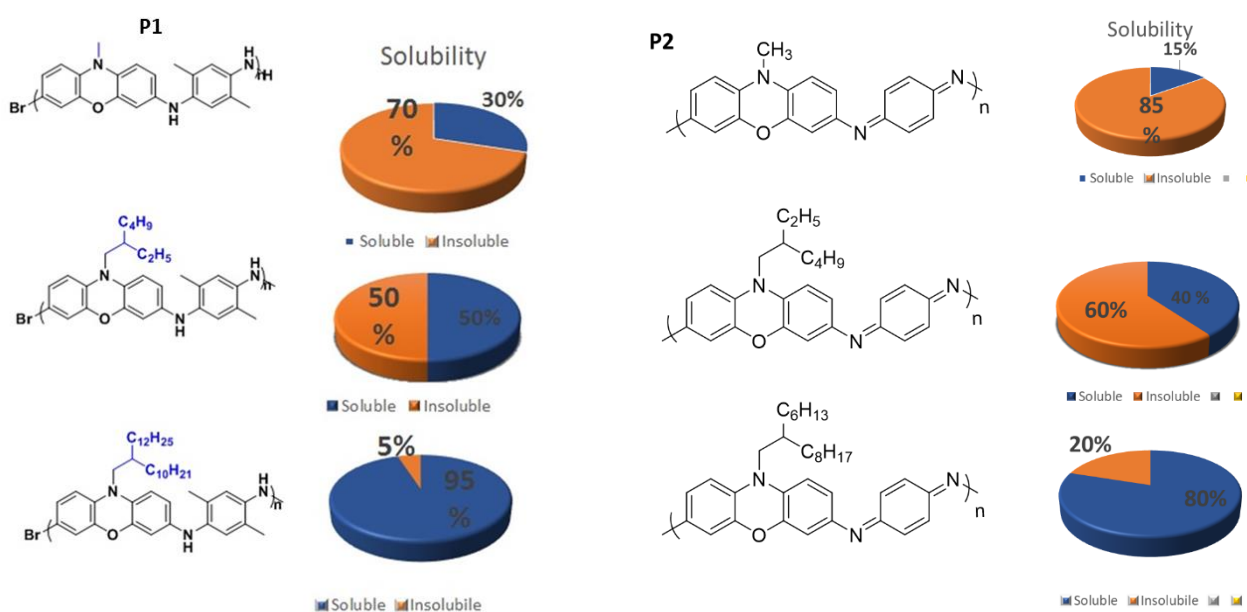

**Figure S5:** FTIR spectra of doped and undoped **P1** and **P2**.

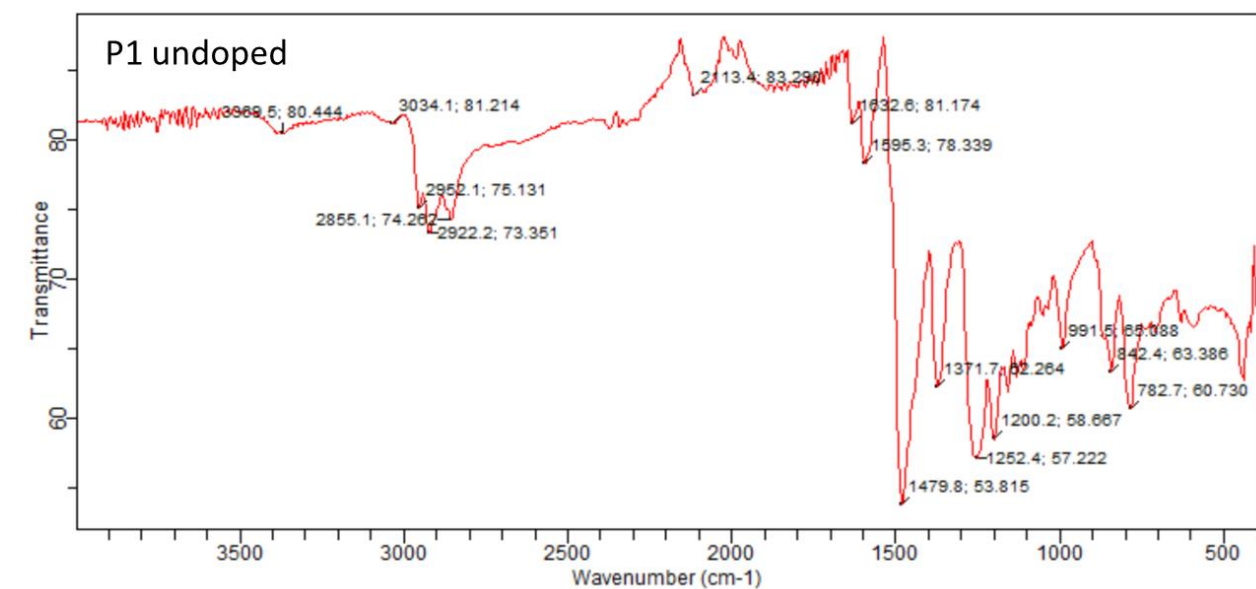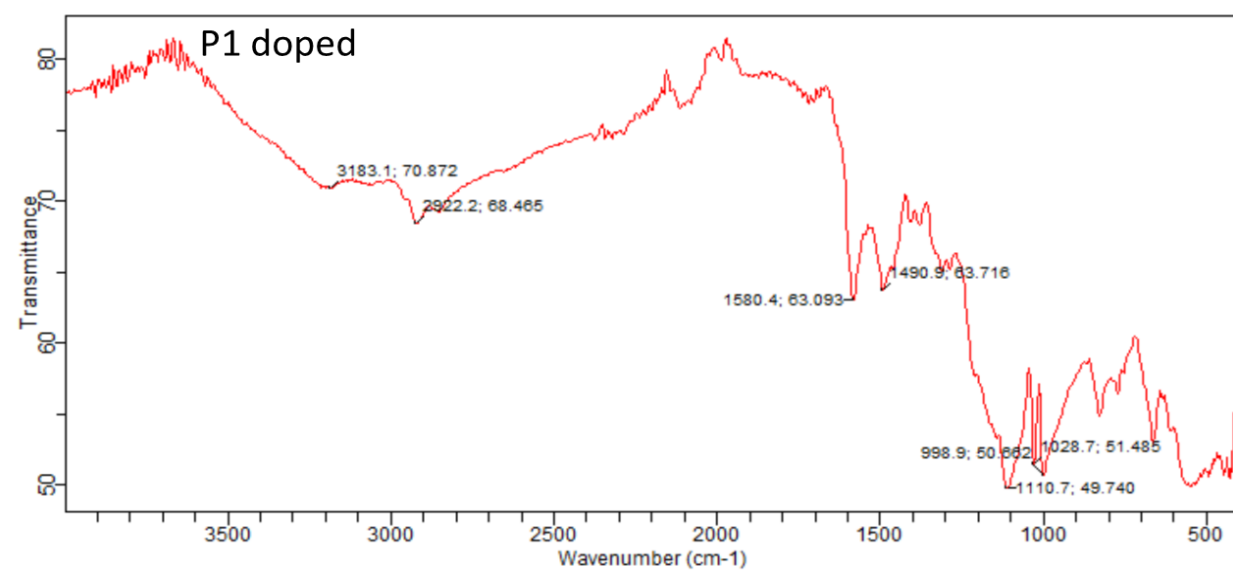

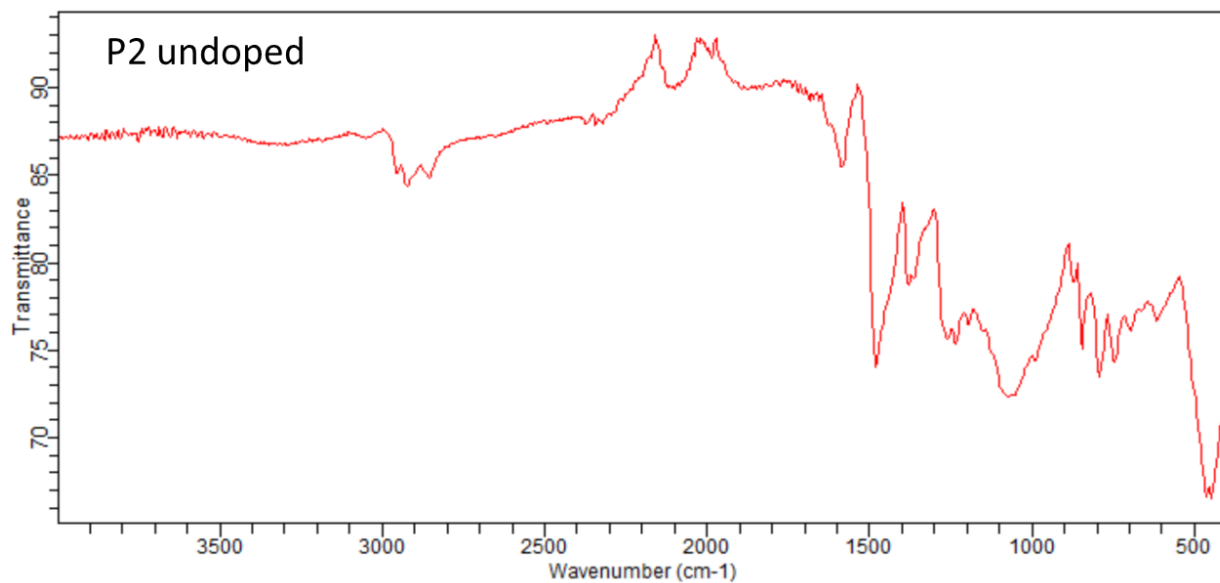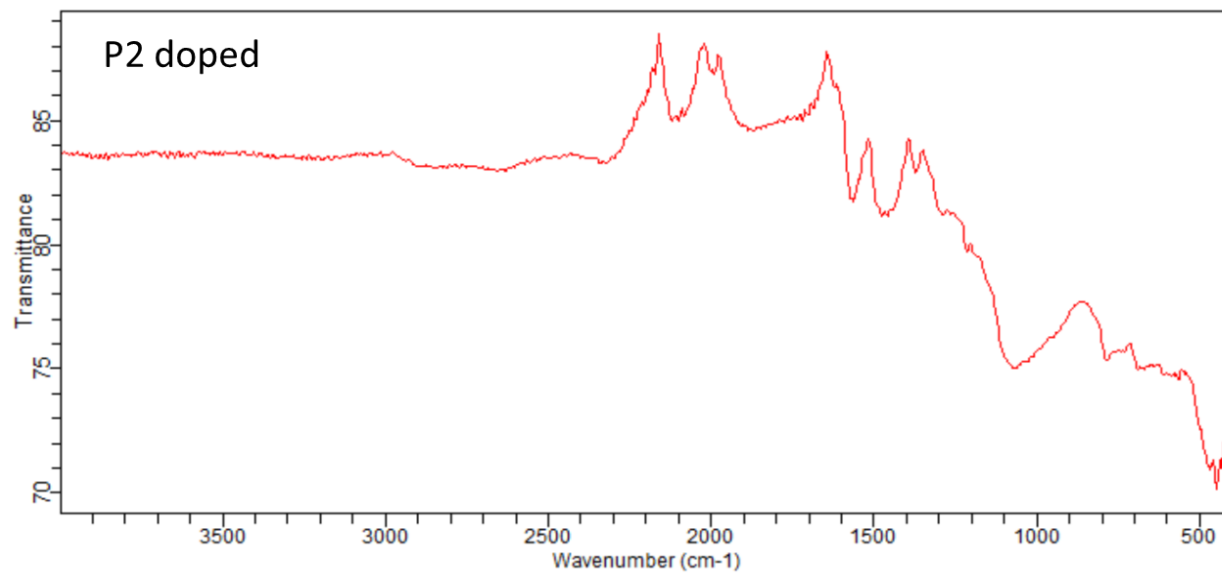

**Table S4:** EPR data for **P1** and **P2**.

| <b>P1</b>      |            |                 | <b>P2</b>      |            |                 |
|----------------|------------|-----------------|----------------|------------|-----------------|
| <b>dopants</b> | <b>a/b</b> | <b>g-factor</b> | <b>dopants</b> | <b>a/b</b> | <b>g-factor</b> |
| CSA            | 1.63       | 2.0045          | CSA            | 1.36       | 2.0039          |
| PSS            | 1.08       | 2.0034          | PSS            | 1.78       | 2.0054          |
| DBS            | 1.19       | 2.0036          | DBS            | 1.18       | 2.0040          |
| HCl            | 1.05       | 2.0033          | HCl            | 1.05       | 2.0035          |

**Table S5:** Summary of conductivity studies for **P1**.

| Entry | Sample preparation                   | Conductivity (S/cm) | Average |
|-------|--------------------------------------|---------------------|---------|
| 1     | P1-CSA                               | 0.0012              | -       |
| 2     | P1-CSA                               | 0.019               | -       |
| 3     | P1-CSA- <i>m</i> -cresol/no heat     | 4.48                | 2.82    |
| 4     | P1-CSA- <i>m</i> -cresol/no heat     | 1.39                |         |
| 5     | P1-CSA- <i>m</i> -cresol/no heat     | 2.58                |         |
| 3     | P1-CSA- <i>m</i> -cresol/no heat     | 4.58                | -       |
| 6     | P1-CSA- <i>m</i> -cresol /heat 1 min | 4.08                |         |
| 7     | P1-CSA- <i>m</i> -cresol/heat 2 min  | 2.85                |         |
| 8     | P1-CSA- <i>m</i> -cresol/heat 3 min  | 2.56                |         |
| 9     | P1-CSA- <i>m</i> -cresol/heat 4 min  | 2.38                |         |

Entry 1 was spin-coated; entry 2 was drop-casted; entries 3-12 were drop-casted. All films were prepared on glass slides. Entries 3-12 were slowly dried in the presence of *m*-cresol vapor. All samples were air-dried for 24 h following preparation. For entries 9-12, heating was provided by a heating gun.

**Table S6:** Summary of conductivity studies for **P2**.

| Entry | Sample Preparation       | Conductivity (S/cm) | Average |
|-------|--------------------------|---------------------|---------|
| 1     | P2-CSA- <i>m</i> -cresol | 0.350               | 0.408   |
| 2     | P2-CSA- <i>m</i> -cresol | 0.350               |         |
| 3     | P2-CSA- <i>m</i> -cresol | 0.431               |         |
| 4     | P2-CSA- <i>m</i> -cresol | 0.499               |         |

All samples were drop casted on glass slides and the solvent slowly removed in the presence of *m*-cresol vapor, followed by 24 h air drying.

**Figure S6:** SEM images of **P1** at different length scale.

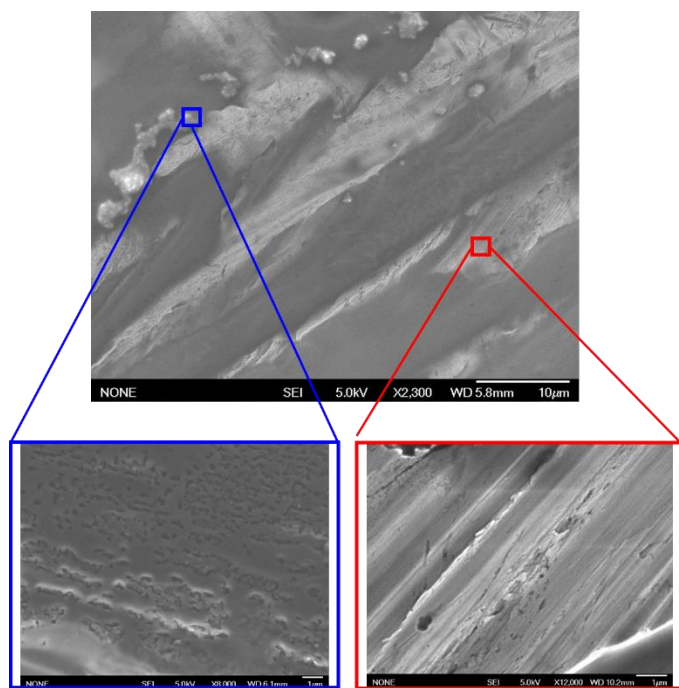

**Figure S7:** XRD data for **P1** and **P2** crushed films casted from EtOH in the presence and absence of *m*-cresol (temp. at 100 K).

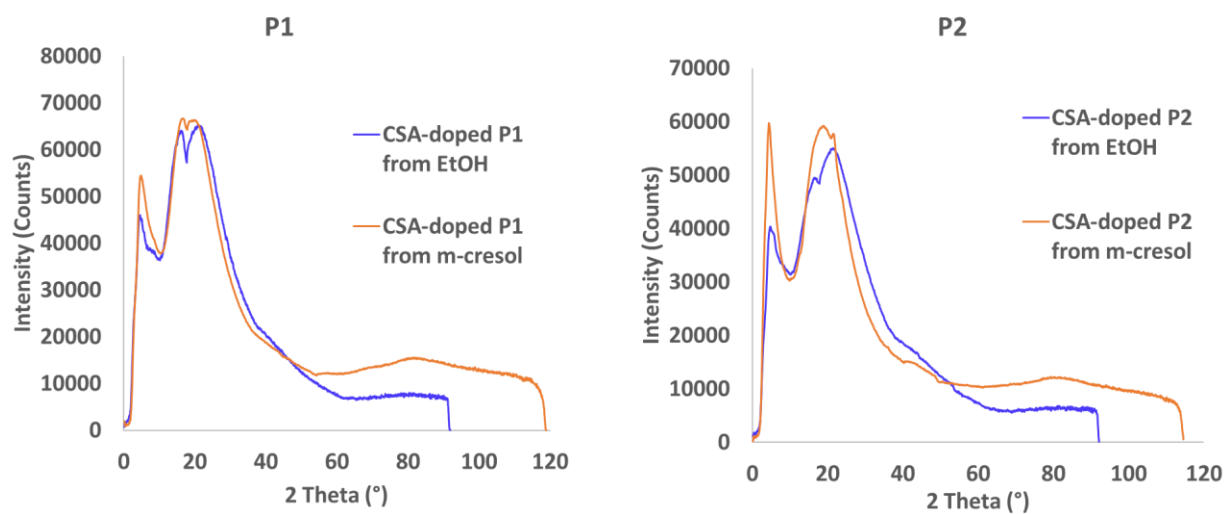



**Table S7:** XRD values for **P1** absence of *m*-cresol

| <i>Index</i> | <i>2 theta (deg)</i> | <i>D-spacing (Å)</i> | <i>Intensity (counts)</i> |
|--------------|----------------------|----------------------|---------------------------|
| <b>1</b>     | 4.715                | 18.72445             | 33614.7                   |
| <b>2</b>     | 16.093               | 5.50316              | 29389.9                   |
| <b>3</b>     | 21.167               | 4.19389              | 26976.5                   |

**Table S8:** XRD values for **P1** presence of *m*-cresol

| <i>Index</i> | <i>2 theta (deg)</i> | <i>D-spacing (Å)</i> | <i>Intensity (counts)</i> |
|--------------|----------------------|----------------------|---------------------------|
| <b>1</b>     | 4.701                | 18.78396             | 48643.3                   |
| <b>2</b>     | 16.538               | 5.35589              | 49379.9                   |
| <b>3</b>     | 19.709               | 4.5008               | 47205.4                   |
| <b>4</b>     | 81.963               | 1.17457              | 256.738                   |

**Table S9:** XRD values for **P2** absence of *m*-cresol

| <i>Index</i> | <i>2 theta (deg)</i> | <i>D-spacing (Å)</i> | <i>Intensity (counts)</i> |
|--------------|----------------------|----------------------|---------------------------|
| <b>1</b>     | 1                    | 4.879                | 18.09659                  |
| <b>2</b>     | 2                    | 16.584               | 5.34128                   |
| <b>3</b>     | 3                    | 21.577               | 4.11526                   |

**Table S10:** XRD values for **P2** presence of *m*-cresol

| <i>Index</i> | <i>2 theta (deg)</i> | <i>D-spacing (Å)</i> | <i>Intensity (counts)</i> |
|--------------|----------------------|----------------------|---------------------------|
| <b>1</b>     | 4.255                | 20.74743             | 54007.3                   |
| <b>2</b>     | 18.697               | 4.74211              | 59113.3                   |
| <b>3</b>     | 21.474               | 4.13468              | 57623.6                   |
| <b>4</b>     | 42.427               | 2.12881              | 14900.5                   |
| <b>5</b>     | 48.132               | 1.88897              | 12521.9                   |
| <b>6</b>     | 81.137               | 1.18442              | 11958.1                   |

**Figure S8:** TUNA AFM of **P1**.  $10 \times 10 \mu\text{m}$  imaged region. Height Sensor, Peak Force Error, and Contact Current.

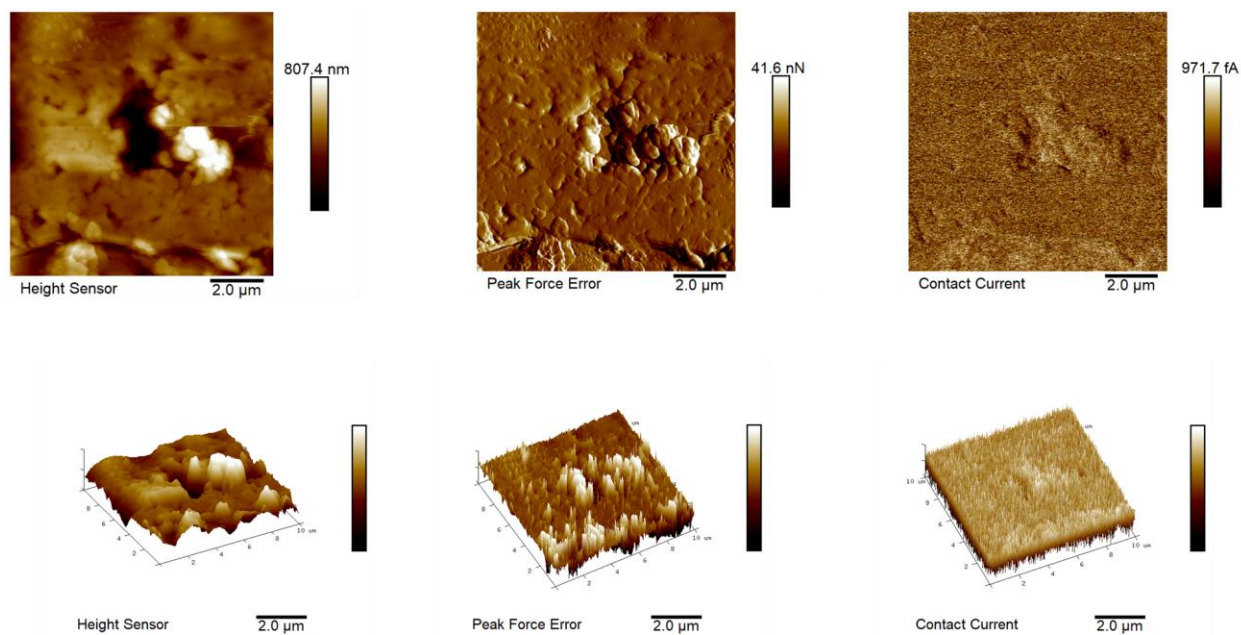

**Figure S9:** 100 cyclic voltammetry cycles of doped **P1** on spray-cast films on ITO/glass in 0.1 M TBAPF<sub>6</sub>/acetonitrile.

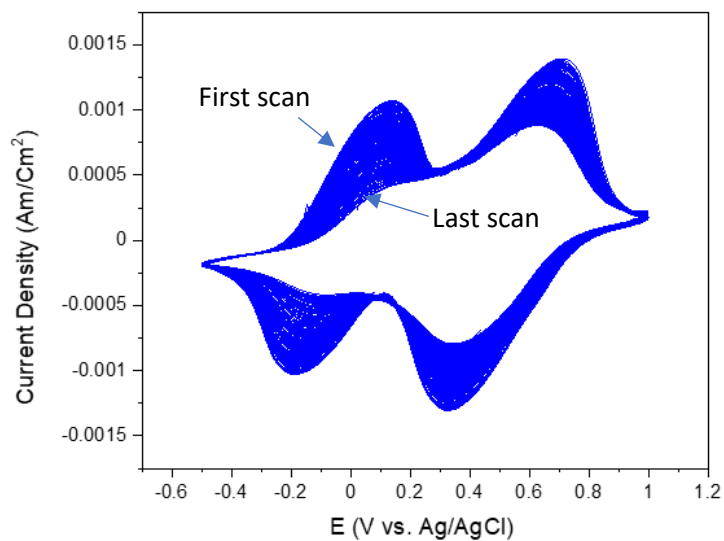

**Figure S10:**  $^1\text{H}$  and  $^{13}\text{C}$  NMR spectra of **1b**

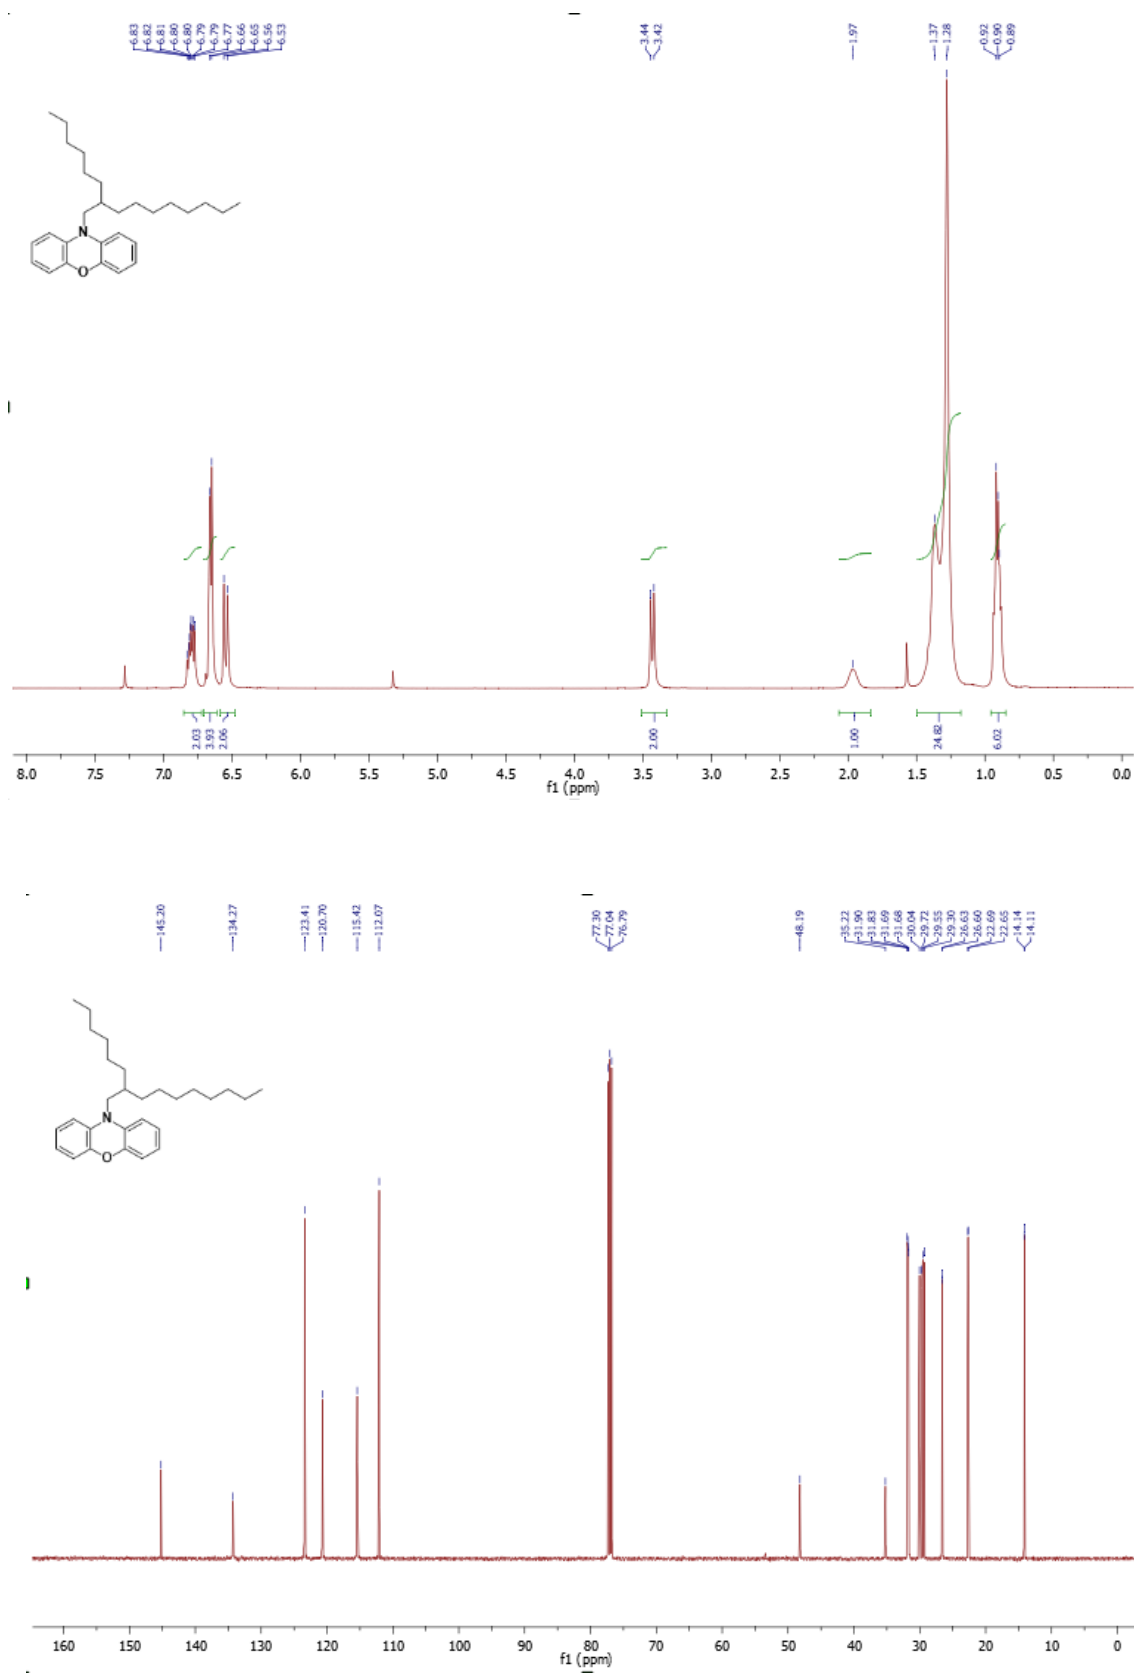

**Figure S11:**  $^1\text{H}$  and  $^{13}\text{C}$  NMR spectra of **1c**

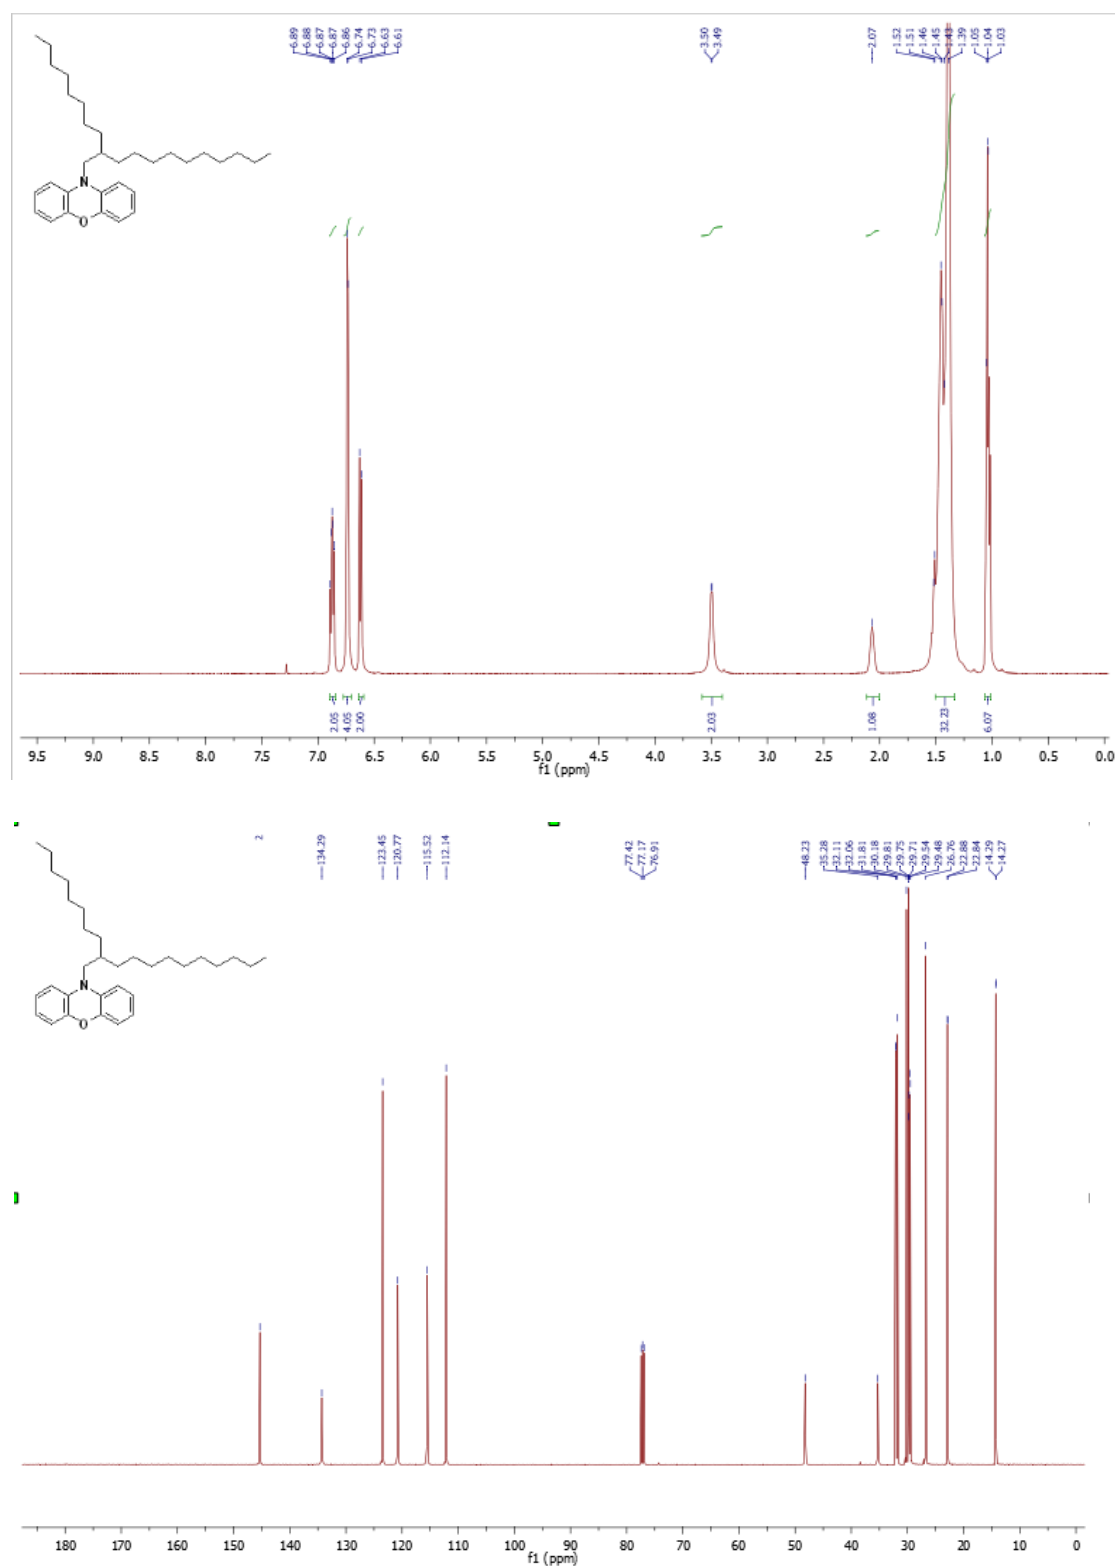

**Figure S12:**  $^1\text{H}$  and  $^{13}\text{C}$  NMR spectra of **2b**

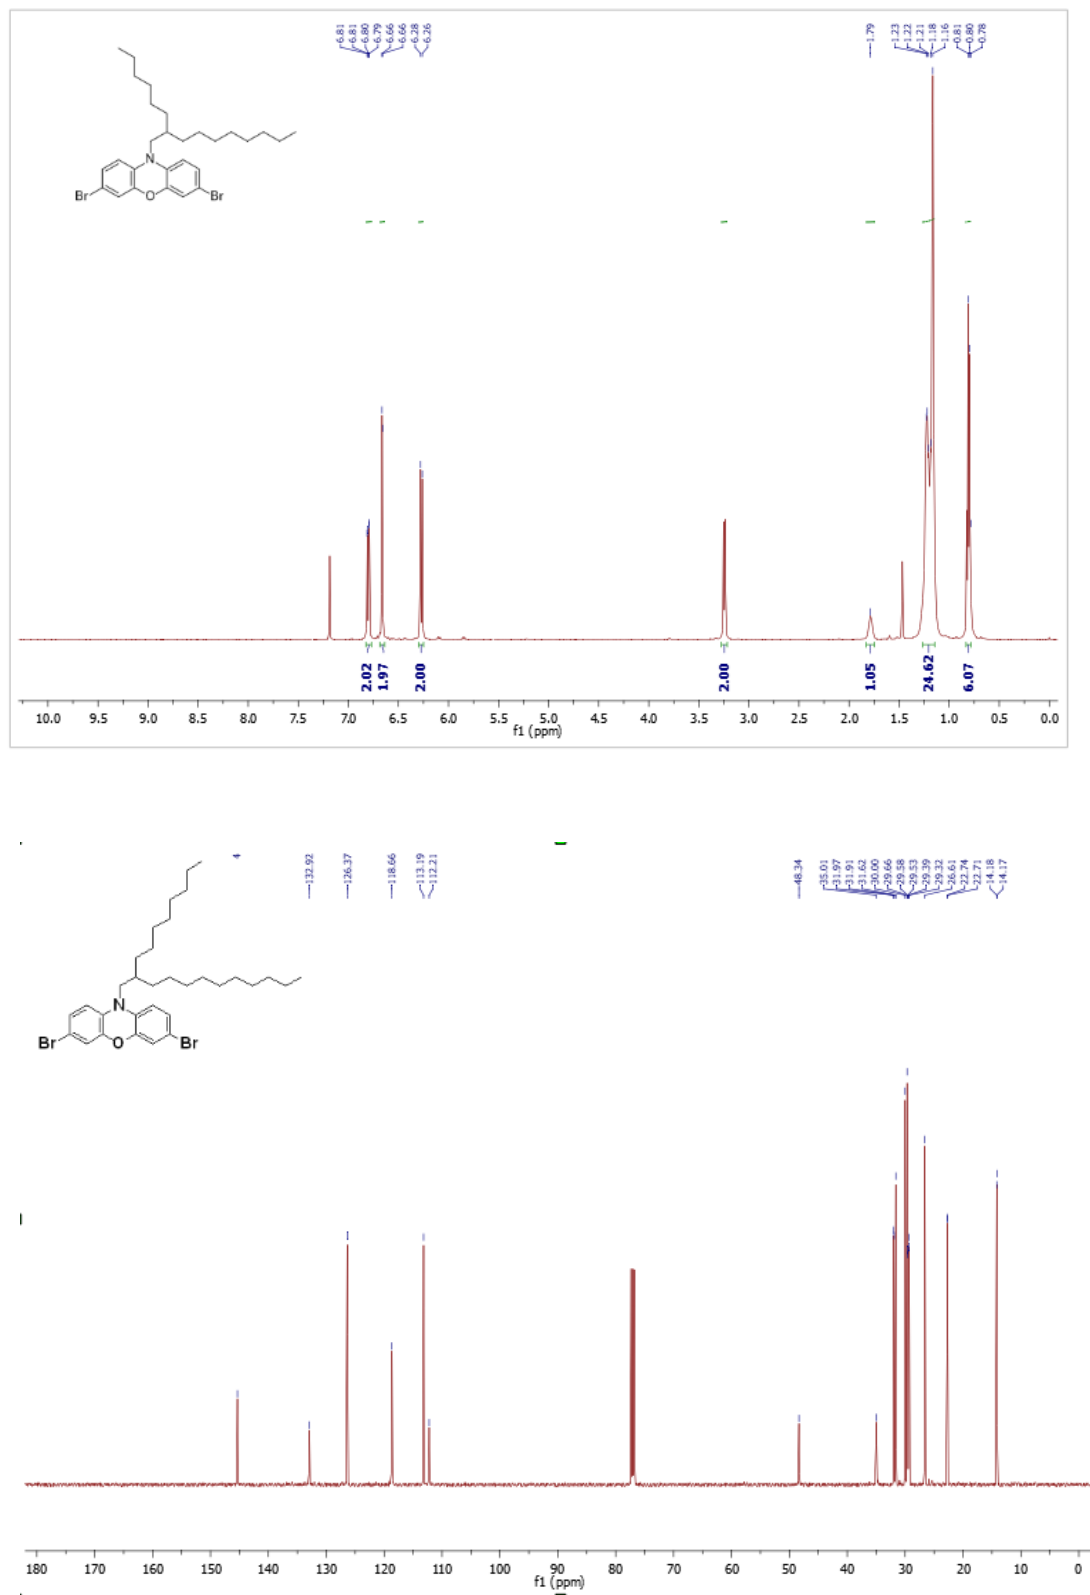

**Figure S13:**  $^1\text{H}$  and  $^{13}\text{C}$  NMR spectra of **2c**

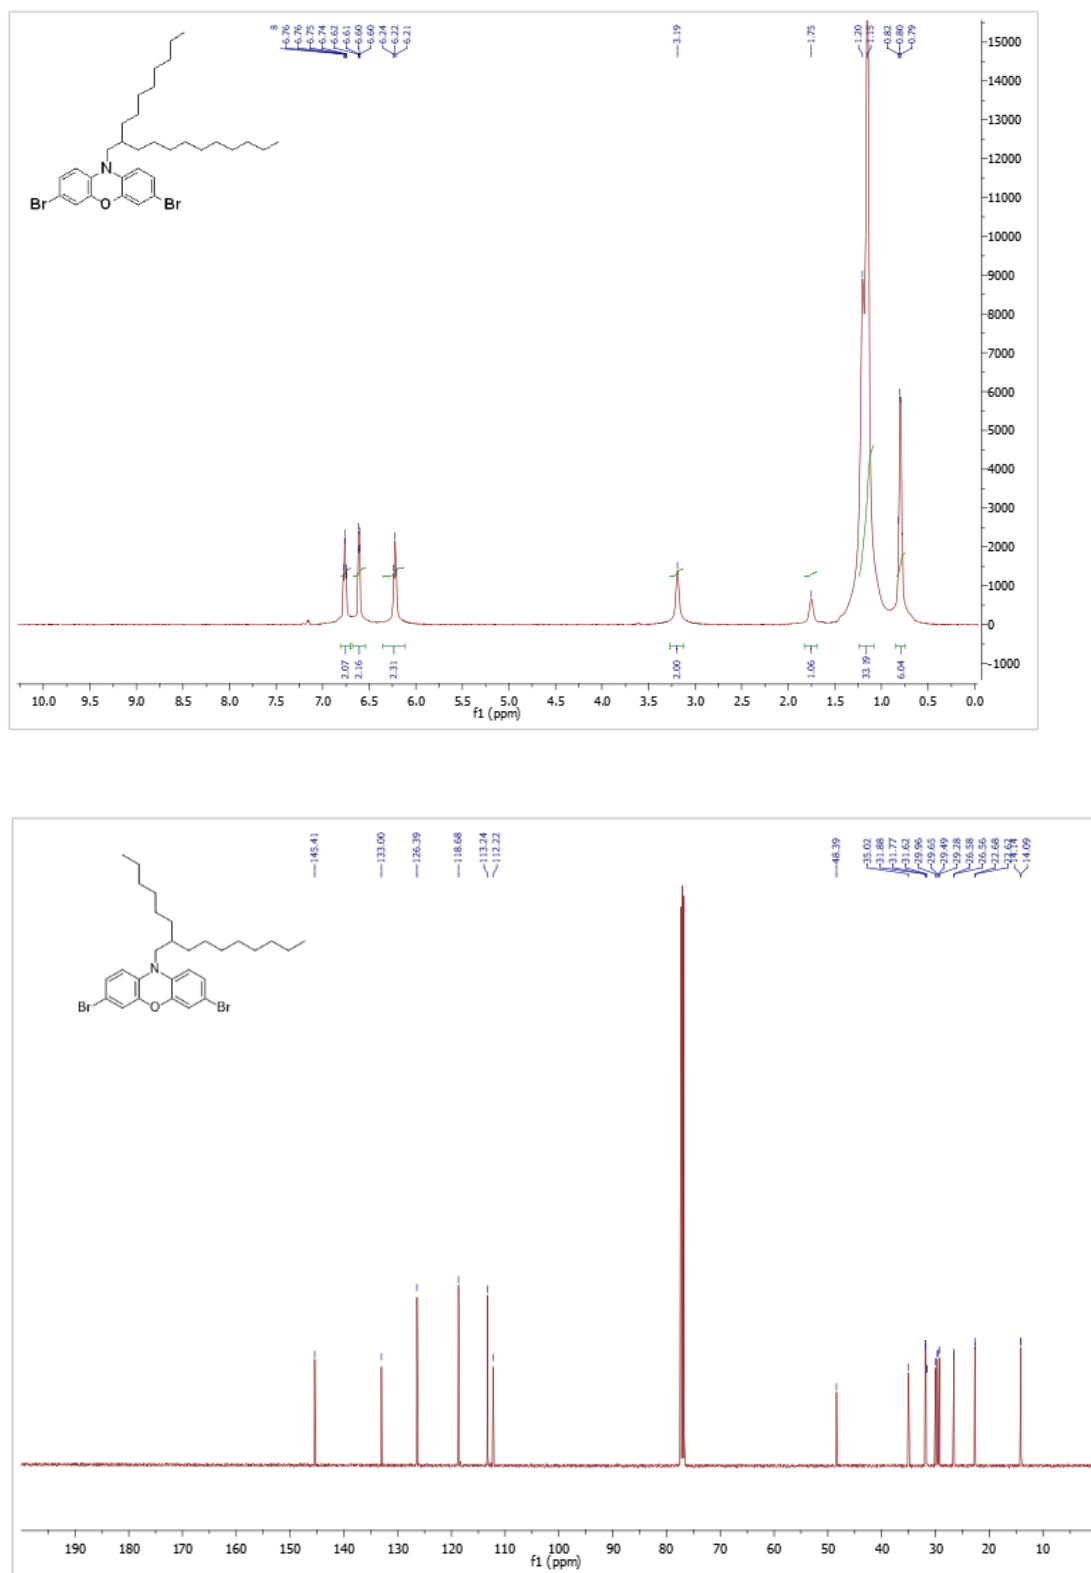

Supplement: Supplementary file 1 [file 28061751]
